# Supplementary material
Source: MDPI journal article supplement (https://www.mdpi.com/1424-8247/15/9/1094)
Supplement: s1 [file s1]

**Supplementary table S2.** Co-expression of biomarkers and inflammation related genes.

| <b>Inflammation<br/>related gene</b> | <b>Biomarker</b> | <b>cor</b>   | <b>p value</b> | <b>Regulation</b> |
|--------------------------------------|------------------|--------------|----------------|-------------------|
| BDKRB1                               | FKBP5            | -0.65123958  | 0.021792337    | negative          |
| CD82                                 | FKBP5            | 0.863575418  | 0.00029466     | positive          |
| CDKN1A                               | FKBP5            | -0.782368639 | 0.002633147    | negative          |
| CHST2                                | FKBP5            | 0.659470315  | 0.019646225    | positive          |
| CXCR6                                | FKBP5            | 0.673761791  | 0.016292707    | positive          |
| INHBA                                | FKBP5            | -0.721062794 | 0.00813693     | negative          |
| LPAR1                                | FKBP5            | 0.649708006  | 0.022209777    | positive          |
| MXD1                                 | FKBP5            | -0.680800725 | 0.014805463    | negative          |
| PTGER4                               | FKBP5            | 0.70652552   | 0.010209257    | positive          |
| RIPK2                                | FKBP5            | -0.632218742 | 0.027398517    | negative          |
| SLC4A4                               | FKBP5            | -0.623010993 | 0.030456877    | negative          |
| TNFSF9                               | FKBP5            | -0.58604887  | 0.045229839    | negative          |
| ADM                                  | IGFBP2           | 0.619614804  | 0.03164453     | positive          |
| CD40                                 | IGFBP2           | 0.637875106  | 0.025633574    | positive          |
| CD82                                 | IGFBP2           | 0.905790243  | 0.0000498      | positive          |
| CDKN1A                               | IGFBP2           | -0.646818915 | 0.023013017    | negative          |
| CHST2                                | IGFBP2           | 0.872735878  | 0.000211527    | positive          |
| IFITM1                               | IGFBP2           | 0.757047546  | 0.00435922     | positive          |
| INHBA                                | IGFBP2           | -0.749747119 | 0.004987399    | negative          |
| LPAR1                                | IGFBP2           | 0.593798189  | 0.041783501    | positive          |
| MXD1                                 | IGFBP2           | -0.794320094 | 0.002028742    | negative          |
| PTGER4                               | IGFBP2           | 0.788471206  | 0.002309513    | positive          |
| RIPK2                                | IGFBP2           | -0.719995108 | 0.008277386    | negative          |
| SLC4A4                               | IGFBP2           | -0.745148832 | 0.005416701    | negative          |
| TLR2                                 | IGFBP2           | 0.604987195  | 0.037142038    | positive          |
| TNFRSF1B                             | IGFBP2           | 0.728583385  | 0.007197474    | positive          |
| BDKRB1                               | SAMHD1           | -0.722948357 | 0.007893244    | negative          |
| CD82                                 | SAMHD1           | 0.752408175  | 0.004750999    | positive          |
| CDKN1A                               | SAMHD1           | -0.604274036 | 0.037426353    | negative          |
| CXCR6                                | SAMHD1           | 0.639525823  | 0.02513441     | positive          |
| IL1R1                                | SAMHD1           | 0.587393356  | 0.044618005    | positive          |
| IL6                                  | SAMHD1           | -0.579363545 | 0.048360329    | negative          |
| PTGER2                               | SAMHD1           | 0.586135805  | 0.045190099    | positive          |
| RIPK2                                | SAMHD1           | -0.655653831 | 0.020621179    | negative          |
| SCN1B                                | SAMHD1           | -0.636717191 | 0.025987976    | negative          |
| SLC4A4                               | SAMHD1           | -0.582409884 | 0.046915516    | negative          |
| C5AR1                                | TMTC1            | 0.714209971  | 0.009070195    | positive          |
| CD82                                 | TMTC1            | 0.721169657  | 0.00812297     | positive          |
| CXCR6                                | TMTC1            | 0.833635546  | 0.000753658    | positive          |

|         |        |              |             |          |
|---------|--------|--------------|-------------|----------|
| LPAR1   | TMTC1  | 0.608111384  | 0.035914653 | positive |
| MXD1    | TMTC1  | -0.63942472  | 0.025164779 | negative |
| PTGER2  | TMTC1  | 0.822676097  | 0.001016776 | positive |
| TNFAIP6 | TMTC1  | -0.582544685 | 0.046852295 | negative |
| TNFSF9  | TMTC1  | -0.677741891 | 0.015438898 | negative |
| CXCR6   | PTGER2 | 0.69943985   | 0.011350871 | positive |
| FZD5    | PTGER2 | 0.603262432  | 0.037832306 | positive |
| IL6     | PTGER2 | -0.718552304 | 0.00847006  | negative |
| PTGER2  | PTGER2 | 1            | 5.71E-66    | positive |
| RAF1    | PTGER2 | 0.656214723  | 0.020475727 | positive |
| TNFAIP6 | PTGER2 | -0.586483484 | 0.045031415 | negative |
| TNFSF9  | PTGER2 | -0.63902551  | 0.02528495  | negative |
