# Supplementary material
Source: MDPI journal article supplement (https://www.mdpi.com/1424-8247/15/9/1094)
Supplement: s1 [file s1]

**Supplementary table S1.** Co-expression of biomarkers and immune related genes.

| <b>Immune related gene</b> | <b>Biomarker</b> | <b>cor</b> | <b>p value</b> | <b>Regulation</b> |
|----------------------------|------------------|------------|----------------|-------------------|
| SAMHD1                     | FKBP5            | 0.878497   | 0.000169       | positive          |
| APOD                       | FKBP5            | 0.841998   | 0.000591       | positive          |
| SAA1                       | FKBP5            | 0.657604   | 0.020119       | positive          |
| TSC22D3                    | FKBP5            | 0.632426   | 0.027332       | positive          |
| ANGPT1                     | FKBP5            | 0.698622   | 0.011488       | positive          |
| PTK2B                      | FKBP5            | 0.784954   | 0.002492       | positive          |
| ANOS1                      | FKBP5            | -0.71911   | 0.008395       | negative          |
| NRG1                       | FKBP5            | -0.61721   | 0.032506       | negative          |
| AGTR1                      | FKBP5            | 0.791893   | 0.002142       | positive          |
| EDNRB                      | FKBP5            | 0.612917   | 0.034084       | positive          |
| PDGFD                      | FKBP5            | 0.728478   | 0.00721        | positive          |
| SDC1                       | FKBP5            | -0.60023   | 0.039067       | negative          |
| C7                         | FKBP5            | 0.679423   | 0.015088       | positive          |
| C5AR2                      | FKBP5            | 0.645377   | 0.023422       | positive          |
| GDF7                       | FKBP5            | 0.65612    | 0.0205         | positive          |
| EPGN                       | FKBP5            | -0.65542   | 0.020681       | negative          |
| A2M                        | FKBP5            | 0.645669   | 0.023339       | positive          |
| UCN2                       | FKBP5            | 0.678846   | 0.015208       | positive          |
| PTH1R                      | FKBP5            | 0.577018   | 0.049494       | positive          |
| NGFR                       | FKBP5            | 0.746981   | 0.005242       | positive          |
| SAMHD1                     | IGFBP2           | 0.638202   | 0.025534       | positive          |
| APOD                       | IGFBP2           | 0.812225   | 0.001329       | positive          |
| LGR4                       | IGFBP2           | -0.77284   | 0.003206       | negative          |
| ANGPTL4                    | IGFBP2           | 0.733831   | 0.006592       | positive          |
| PTK2B                      | IGFBP2           | 0.645715   | 0.023325       | positive          |
| NRG1                       | IGFBP2           | -0.65704   | 0.020262       | negative          |
| AGTR1                      | IGFBP2           | 0.781886   | 0.00266        | positive          |
| PDGFD                      | IGFBP2           | 0.611956   | 0.034444       | positive          |
| LEP                        | IGFBP2           | 0.740169   | 0.005912       | positive          |
| SDC1                       | IGFBP2           | -0.77122   | 0.003313       | negative          |
| NR2F1                      | IGFBP2           | 0.718353   | 0.008497       | positive          |
| C7                         | IGFBP2           | 0.814873   | 0.001244       | positive          |
| EPGN                       | IGFBP2           | -0.87914   | 0.000165       | negative          |
| STC1                       | IGFBP2           | 0.635467   | 0.026375       | positive          |
| A2M                        | IGFBP2           | 0.703206   | 0.010733       | positive          |
| CCL13                      | IGFBP2           | 0.701208   | 0.011058       | positive          |
| UCN2                       | IGFBP2           | 0.816073   | 0.001206       | positive          |
| PTH1R                      | IGFBP2           | 0.645509   | 0.023384       | positive          |
| NGFR                       | IGFBP2           | 0.703752   | 0.010645       | positive          |
| SAMHD1                     | SAMHD1           | 1          | 1.03E-70       | positive          |

|          |        |          |          |          |
|----------|--------|----------|----------|----------|
| APOD     | SAMHD1 | 0.813539 | 0.001286 | positive |
| PTGER2   | SAMHD1 | 0.586136 | 0.04519  | positive |
| SAA1     | SAMHD1 | 0.698088 | 0.011579 | positive |
| MMP7     | SAMHD1 | 0.597863 | 0.040052 | positive |
| TSC22D3  | SAMHD1 | 0.652469 | 0.021461 | positive |
| ANGPT1   | SAMHD1 | 0.626446 | 0.029289 | positive |
| PTK2B    | SAMHD1 | 0.653912 | 0.021078 | positive |
| ANOS1    | SAMHD1 | -0.7379  | 0.006149 | negative |
| AGTR1    | SAMHD1 | 0.706966 | 0.010141 | positive |
| GDF7     | SAMHD1 | 0.661101 | 0.01924  | positive |
| EPGN     | SAMHD1 | -0.65035 | 0.022035 | negative |
| SLC40A1  | SAMHD1 | 0.679409 | 0.015091 | positive |
| A2M      | SAMHD1 | 0.616625 | 0.032717 | positive |
| NGFR     | SAMHD1 | 0.686714 | 0.013635 | positive |
| IL6      | SAMHD1 | -0.57936 | 0.04836  | negative |
| SAMHD1   | TMTC1  | 0.82189  | 0.001038 | positive |
| PTGER2   | TMTC1  | 0.822676 | 0.001017 | positive |
| LGR4     | TMTC1  | -0.65592 | 0.020552 | negative |
| ANGPT1   | TMTC1  | 0.700543 | 0.011167 | positive |
| LEPR     | TMTC1  | 0.582698 | 0.046781 | positive |
| ANOS1    | TMTC1  | -0.79171 | 0.002151 | negative |
| NRG1     | TMTC1  | -0.63645 | 0.026069 | negative |
| EDNRB    | TMTC1  | 0.617272 | 0.032483 | positive |
| C5AR1    | TMTC1  | 0.71421  | 0.00907  | positive |
| C5AR2    | TMTC1  | 0.639859 | 0.025034 | positive |
| IL1RL1   | TMTC1  | 0.650512 | 0.02199  | positive |
| GDF7     | TMTC1  | 0.840359 | 0.000621 | positive |
| SLC40A1  | TMTC1  | 0.687872 | 0.013415 | positive |
| PPARGC1A | TMTC1  | 0.665063 | 0.018279 | positive |
| AREG     | TMTC1  | 0.6712   | 0.01686  | positive |
| CRABP2   | TMTC1  | -0.59813 | 0.039942 | negative |
| SAMHD1   | PTGER2 | 0.586136 | 0.04519  | positive |
| PTGER2   | PTGER2 | 1        | 7.94E-69 | positive |
| ANOS1    | PTGER2 | -0.70111 | 0.011074 | negative |
| SLC40A1  | PTGER2 | 0.630415 | 0.027979 | positive |
| PPARGC1A | PTGER2 | 0.80576  | 0.001556 | positive |
| CRABP2   | PTGER2 | -0.80215 | 0.001694 | negative |
| IL6      | PTGER2 | -0.71855 | 0.00847  | negative |
