# Supplementary material
Source: MDPI journal article supplement (https://www.mdpi.com/1424-8247/15/9/1094)
Supplement: s1 [file s1]

**Supplementary table S5.** Antibody information

| Antibody name                       | Product Code    | Manufacturer | Country |
|-------------------------------------|-----------------|--------------|---------|
| ALP                                 | ABP53294        | Abbkine      | China   |
| RUNX2                               | ABP53087        | Abbkine      | China   |
| FKBP5                               | 14155-1-AP      | proteintech  | USA     |
| IGFBP2                              | 11065-3-AP      | proteintech  | USA     |
| PTGER2                              | 38496-1         | Signalway    | China   |
| SAMHD1                              | 12586-1-AP      | proteintech  | USA     |
| TMTC1                               | 23349-1-AP      | proteintech  | USA     |
| GAPDH                               | TA-08(1:1000)   | ZSGB-BIO     | China   |
| Goat anti-mouse secondary antibody  | 31430 (1:10000) | Thermo       | USA     |
| Goat anti-rabbit secondary antibody | 31460 (1:10000) | Thermo       | USA     |
