# Supplementary material
Source: MDPI journal article supplement (https://www.mdpi.com/1424-8247/15/9/1094)
Supplement: s1 [file s1]

---

**Supplementary table S4.** Primer information

---

| Primer name | Primer sequences (5'-3') |
|-------------|--------------------------|
| RUNX2-F     | ATCTCCGCAGGTCACTACCA     |
| RUNX2-R     | ACTGTGCTGAAGAGGCTGTTT    |
| ALP-F       | TCCTGTTGACACCCCAAACC     |
| ALP-R       | CACATGCCCATGCAACACTT     |
| FKBP5-F     | AAATTCCTCGCTGCCGGACT     |
| FKBP5-R     | CCTCTGAGAAGCGTTCTGTCC    |
| IGFBP2-F    | CACTTGTGAGAAGCGCCG       |
| IGFBP2-R    | TGAGTGGTCATCGCCATTGT     |
| PTGER2-F    | GCAGTCTCCCTGCTCTTCTG     |
| PTGER2-R    | CACCGAGACAATGAGAAGCA     |
| SAMHD1-F    | ACAGACTCACAAGCACCTGG     |
| SAMHD1-R    | TACTGTAGCAGCGTCGTTCC     |
| TMTC1-F     | TGTGGGCGATCGTGAACAAC     |
| TMTC1-R     | TAGCTTGAAGGTGAGGACGC     |
| hGAPDH-F    | TCAAGGCTGAGAACGGGAAG     |
| hGAPDH-R    | TGGACTCCACGACGTACTCA     |

---
