# Supplementary material
Source: MDPI journal article supplement (https://www.mdpi.com/1424-8247/15/9/1094)
Supplement: s1 [file s1]

**Supplementary table S3.** Gene expression data from Gene Expression Omnibus (GEO) database.

| Dataset ID | Total samples | Control | Treat | Data type  | Platforms     | Tissue type   | Country   | Species      | Source                                   |
|------------|---------------|---------|-------|------------|---------------|---------------|-----------|--------------|------------------------------------------|
| GSE159137  | 6             | 6       | 0     | RNA-seq    | Illumina 2000 | HiSeq ADSCs   | Germany   | Homo sapiens | <b>Plastic surgery residual material</b> |
| GSE159138  | 6             | 0       | 6     | RNA-seq    | Illumina 2000 | HiSeq ADSCs   | Germany   | Homo sapiens | <b>Plastic surgery residual material</b> |
| GSE114117  | 7             | 1       | 6     | RNA-seq    | Illumina Ten  | HiSeq X BMSCs | China     | Homo sapiens | <b>Donation</b>                          |
| GSE88865   | 6             | 3       | 3     | Microarray | Affymetrix    | PDMSCs        | China     | Homo sapiens | <b>Donation</b>                          |
| GSE153829  | 6             | 0       | 6     | Microarray | Agilent       | BMSCs         | China     | Homo sapiens | <b>Donation</b>                          |
| GSE63754   | 6             | 3       | 3     | Microarray | Agilent       | ADSCs         | Lithuania | Homo sapiens | <b>Plastic surgery residual material</b> |
| GSE73087   | 7             | 1       | 6     | Microarray | Affymetrix    | BMSCs         | China     | Homo sapiens | <b>Purchased from LONZA</b>              |
